## ◆ EDITORIAL VIEWS

Anesthesiology  
1999; 91:603-5  
© 1999 American Society of Anesthesiologists, Inc.  
Lippincott Williams & Wilkins, Inc.

### Preoxygenation

#### *Best Method for Both Efficacy and Efficiency?*

THE purposes of maximally preoxygenating a patient before the induction of general anesthesia and paralysis are to provide the maximum amount of time that a patient can tolerate apnea and for the anesthesia provider to solve a cannot-ventilate, cannot-intubate situation. This issue of ANESTHESIOLOGY contains an intriguing article by Baraka *et al.*<sup>1</sup> that describes a new method of preoxygenation that may be best with regard to both efficacy and efficiency.

Maximal preoxygenation is achieved when the alveolar, arterial, tissue, and venous compartments are all filled with oxygen. However, patients with a decreased capacity for oxygen loading (*i.e.*, decreased functional residual capacity [FRC], hemoglobin concentration, alveolar ventilation, cardiac output) or an increased oxygen extraction, or both, desaturate during apnea much faster than a healthy patient.<sup>2,3</sup> Consequently, in patients with oxygen transport limitations (who desaturate the fastest) and in any patient in whom difficulty in managing the airway is suspected (need to tolerate apnea the longest time), maximal preoxygenation is indicated. Moreover, because the development of a cannot-ventilate, cannot-intubate situation is largely unpredictable, the desirability/need to maximally preoxygenate is theoretically present for all patients. Along this line of thought, the American Society of Anesthesiologists Difficult Airway Algorithm,<sup>4</sup> which makes no mention of preoxygenation, should include a requirement for preoxygenation before the induction of general anesthesia whenever possible; obvious exclusion examples are very uncooperative adult patients and pediatric patients. Two major but preventable reasons why a patient will not be maximally preoxygenated are failure to achieve

an alveolar fraction of oxygen ( $F_{A_{O_2}} = 0.87$  (*i.e.*, failure to breathe fraction inspired oxygen tension [ $F_{I_{O_2}}] = 1.0$  through a sealed system) and insufficient time of preoxygenation.

The major reason for failure to achieve an  $F_{I_{O_2}} = 1.0$  and an  $F_{A_{O_2}} = 0.87$  is a leak under the mask, allowing inspiratory entrainment of room air. Avoiding a leak between the mask and the face is the most important factor in obtaining maximal preoxygenation because it is the one factor that cannot be compensated for by an increased duration of preoxygenation, and relatively minor degrees of leak may be hard to appreciate.<sup>5,6</sup> Using the model of Farmery and Roe,<sup>3</sup> it can be shown that when preapnea  $F_{A_{O_2}}$  is progressively decreased from 0.87 to 0.8, 0.7, 0.6, 0.5, 0.4, 0.3, 0.2, and 0.13 (breathing room air) for a healthy 70-kg patient, apnea times to arterial saturation of oxygen ( $Sa_{O_2} = 60\%$ ) are progressively decreased from 9.90 to 9.32, 8.38, 7.30, 6.37, 5.40, 4.40, 3.55 and 2.80 min, respectively. Clinical endpoints that indicate a sealed system are movement of the reservoir bag in and out with each inhalation and exhalation, respectively; presence of a normal capnogram and an end-tidal partial pressure of carbon dioxide ( $P_{ETCO_2}$ ) and tidal oximetry indicating appropriate inspired and end-tidal values.

The half-time for exponential change in  $F_{A_{O_2}}$  with a step change in  $F_{I_{O_2}}$  is given by  $0.693 \times V_{FRC}/\dot{V}_A$  for a non-rebreathing system. With  $V_{FRC}$  equal to 2.5 l, the half-time is 26 and 13 s when  $\dot{V}_A = 4.0$  and 8.0 l/min, respectively. Thus, most of the oxygen that can be stored in the alveolar and arterial spaces can be brought in by hyperventilation  $F_{I_{O_2}} = 1.0$  for a short period of time and is the basis for the 4-deep-breath-within-30-seconds method of preoxygenation (termed the "4DB/30 sec method").

Indeed, three studies have shown that there is no significant difference between the arterial oxygen tension ( $Pa_{O_2}$ ) achieved with 3-5 min of normal tidal volume ventilation of  $F_{I_{O_2}} = 1.0$  method of preoxygenation (termed the "traditional" [T] method) compared to the 4DB/30 sec method (table 1).<sup>7-9</sup> The similarity in  $Pa_{O_2}$  between the T and 4DB/30 sec methods of preoxygenation has led to the conclusion that the 4DB/30 sec method provides the same amount of preoxygenation as

This Editorial View accompanies the following article: Baraka AS, Taha SK, Aouad MT, El-Khatib MF, Kawkabani N: Preoxygenation: Comparison of maximal breathing and tidal volume breathing techniques. ANESTHESIOLOGY 1999; 91:612-6.

Accepted for publication May 20, 1999.

Key words: ASA Difficult Airway Algorithm; deep breathing; fraction alveolar oxygen; fraction inspired oxygen; hemoglobin desaturation; hypoxia; oxygen stores.

**Table 1. Pa<sub>O<sub>2</sub></sub> before and after Fast Track and Traditional Methods of Preoxygenation**

| Author                | Weight of Patients | Pa <sub>O<sub>2</sub></sub> (mmHg) (mean ± SD) |                    |                      |                         |
|-----------------------|--------------------|------------------------------------------------|--------------------|----------------------|-------------------------|
|                       |                    | Baseline, Room Air                             |                    | After Preoxygenation |                         |
|                       |                    | Fast Track                                     | Traditional        | Fast Track           | Traditional (min)       |
| Gold <sup>7</sup>     | Normal             | 76.5 ± 5.3                                     | 75.8 ± 6.0*        | 339.0 ± 33.9         | 350.4 ± 35.8* (5)       |
| Goldberg <sup>8</sup> | Morbid obesity     | 89.3 ± 13.5                                    | 87.4 ± 12.4*       | 397.5 ± 104.4        | 425.4 ± 81.1* (3)       |
| Norris <sup>9</sup>   | Cesarean section   | 102.5 ± 1.5 (SEM)                              | 100.9 ± 3.1* (SEM) | 404.2 ± 15.2 (SEM)   | 385.0 ± 23.6* (SEM) (3) |

\* No significant difference between fast track and traditional Pa<sub>O<sub>2</sub></sub> values.

the T method. However, three studies have shown that patients preoxygenated using the 4DB/30 sec method desaturate faster than patients preoxygenated using the T method (table 2).<sup>10–12</sup> There are two possible reasons why the 4DB/30 sec method of preoxygenation results in faster desaturation than the T method.

First, if the half-minute volume of ventilation is much greater than the half-minute oxygen inflow rate, re-breathing of exhaled nitrogen must occur, which, in turn, will lower the F<sub>I</sub>O<sub>2</sub> less than 1.0.<sup>10</sup> However, simple calculation (and daily clinical observation of tidal oximetry) shows that the effect of nitrogen re-breathing in a completely oxygen-loaded standard anesthesia circle system is a minor factor causing submaximal preoxygenation. It is not surprising, therefore, that patients preoxygenated by the 4DB/30 sec method using an oxygen inflow rate of 35 l/min still desaturate to an Sa<sub>O<sub>2</sub></sub> = 90%, much faster (212 ± 92 s) than patients preoxygenated using the T method (406 ± 75 s).<sup>11</sup>

Another reason why patients preoxygenated with the 4DB/30 sec method desaturate faster is because the tissue and venous compartments need more than 30 s to fill with oxygen; these compartments have the capability of holding a significant amount of additional oxygen above that contained while breathing room air.<sup>13</sup> In fact, if during breathing F<sub>I</sub>O<sub>2</sub> equal to 1.0, the alveolar arterial, venous, and tissue compartments are all considered, total whole-body oxygen stores can theoretically increase 1,200 and 800 ml from the end of the first half-minute (at 30 s) and first minute (at 60 s), respectively, to the end of the third minute (at 180 s) (fig. 1).<sup>13</sup> The 1,200 and 800 ml theoretically gained from the first half-minute and minute to the third minute, respectively, would be worth 3 to 4 min of oxygen consumption during apnea and can certainly account for the observed difference in rates of hemoglobin desaturation during apnea between the 4DB/30 sec and T methods of preoxygenation.

The article by Baraka *et al.*<sup>1</sup> is valuable because it not

only confirms the previously observed differences between 4DB/30 sec and T methods of preoxygenation, but, more importantly, shows that an 8-deep-breath-in-60-seconds method of preoxygenation (termed “8DB/60 sec”) results in a slower rate of hemoglobin desaturation (to Sa<sub>O<sub>2</sub></sub> = 95%) during apnea than the T method. This is a surprising and clinically very important result because one would intuitively think that the 8DB/60 sec method would have results somewhere in between the 4DB/30 sec and T methods. However, because the authors used a relatively small volume Mapleson-D circuit (2.5 l) and a different oxygen flow rate in comparing 4DB/30 sec, 8DB/60 sec, and T methods, these results will require confirmation in a standard anesthesia machine circle system using the same flow rate for all conditions.

The authors hypothesized that the 8DB/60 sec method might result in a greater store of oxygen in the alveolar compartment compared to the T method by either causing an increase in flow rate into or the volume of the compartment. However, it is very unlikely that there was a significant difference in the amount of oxygen in the alveolar compartment (the product of F<sub>A</sub>O<sub>2</sub> × FRC) between the T and 8DB/60 sec methods of preoxygenation. Because the Pa<sub>O<sub>2</sub></sub> values were nearly equal, the PA<sub>O<sub>2</sub></sub> and F<sub>A</sub>O<sub>2</sub> had to be nearly equal for the two groups. Because all patients (who had no lung disease) were paralyzed and tracheally intubated and because the air-

**Table 2. Time to Sa<sub>O<sub>2</sub></sub> = 90% (or Sa<sub>O<sub>2</sub></sub> = 93%) following Fast Track versus Traditional Methods of Preoxygenation**

| Author                  | Type of Patient | Time to Sa <sub>O<sub>2</sub></sub> = 90% (s) (mean ± SD) |                                        |
|-------------------------|-----------------|-----------------------------------------------------------|----------------------------------------|
|                         |                 | Fast Track                                                | Traditional (min)                      |
| Gambee <sup>10</sup>    | Normal          | 408 ± 108                                                 | 534 ± 60* (3)                          |
| Valentine <sup>11</sup> | Elderly         | 212 ± 92                                                  | 406 ± 75* (3)                          |
| McCarthy <sup>12</sup>  | Elderly         | 222 ± 96                                                  | 324 ± 102*                             |
|                         |                 | (to Sa <sub>O<sub>2</sub></sub> = 93%)                    | (to Sa <sub>O<sub>2</sub></sub> = 93%) |

\* Statistically significant greater time to Sa<sub>O<sub>2</sub></sub> = 90% (and Sa<sub>O<sub>2</sub></sub> = 93%) between traditional vs. fast track methods of preoxygenation.

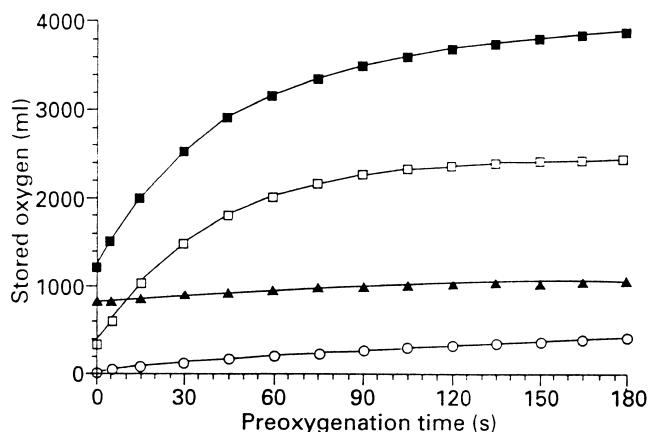

**Fig. 1.** Variation in volume of oxygen stored in the functional residual capacity (□), the blood (▲), the tissue (○), and the whole body (■), with duration of preoxygenation. (Reprinted with permission from Campbell and Beatty.<sup>13</sup>)

way was exposed to atmospheric pressure at the beginning of the apnea period, the FRC for the two groups should have been nearly equal. Thus, the amount of oxygen in the alveolar compartment cannot provide the explanation for the different rates of hemoglobin desaturation.

Given that the half-time for decreases in  $\text{Pa}_{\text{CO}_2}$  with step increases in minute ventilation is 3 min, the 8DB/60 sec method (hyperventilation for 1 min) could result in a significant decrease in  $\text{Pa}_{\text{CO}_2}$  and an increase in  $\text{pH}$ . A significant decrease in  $\text{Pa}_{\text{CO}_2}$  and an increase  $\text{pH}$  could result in a significant change in blood compartment oxygen transport variables, such as the position of the oxyhemoglobin dissociation curve, oxygen consumption, cardiac output, and blood and plasma volumes, which, in turn, could alter the rate of hemoglobin desaturation. Thus, the answer as to why the 8DB/60 sec method resulted in slower hemoglobin desaturation than the T method may reside in the blood compartment rather than in the alveolar compartment. Future areas of useful research will be to determine how oxygen transport parameters, the overall well-being of the patient, and rates of hemoglobin desaturation to levels lower than an  $\text{Sa}_{\text{O}_2}$  equal to 95% are effected by the 8DB/60 sec

method of preoxygenation. Obviously, if the 8DB/60 sec method of preoxygenation clears the system used and the physiologic hurdles, then it will fulfill efficacy and efficiency criteria for being the best method of preoxygenation.

**Jonathan L. Benumof, M.D.**

Professor of Anesthesia

Department of Anesthesiology

University of California at San Diego Medical Center

San Diego, California 92103-8812

jbenumof@UCSD.edu

## References

1. Baraka AS, Taha SK, Aouad MT, El-Khatib MF, Kawkabani N: Pre-oxygenation: Comparison of maximal breathing and tidal volume breathing techniques. *ANESTHESIOLOGY* 1999; 91:612-6
2. Benumof JL, Dagg R, Benumof R: Critical hemoglobin desaturation will occur before return to an unparalyzed state following 1 mg/kg intravenous succinylcholine. *Anesth* 1997; 87:979-82
3. Farmery AD, Roe PG: A model to describe the rate of oxyhemoglobin desaturation during apnoea. *Br J Anaesth* 1996; 76:284-91
4. Practice Guidelines for Management of the Difficult Airway. A report by the American Society of Anesthesiologists Task Force on the Management of the Difficult Airway. *ANESTHESIOLOGY* 1993; 78:597-602
5. Berry CB, Myles PS: Preoxygenation in healthy volunteers: A graph of oxygen "washin" using end-tidal oxygraphy. *Br J Anaesth* 1994; 72:116-8
6. McGowan P, Skinney A: Preoxygenation—The importance of a good face mask seal. *Br J Anaesth* 1995; 75:777-8
7. Gold MI, Durate I, Muravchick S: Arterial oxygenation in conscious patients after 5 minutes and after 30 seconds of oxygen breathing. *Anesth Analg* 1981; 60:313-5
8. Goldberg ME, Norris MC, Laryani GE, Marr AT, Seltzer JL: Preoxygenation in the morbidly obese: A comparison of two techniques. *Anesth Analg* 1989; 68:520-2
9. Norris MC, Dewan DM: Preoxygenation for cesarean section: A comparison of two techniques. *ANESTHESIOLOGY* 1985; 62:827-9
10. Gambee AM, Hertzka R, Fisher D: Preoxygenation techniques: Comparison of three minutes and 4 breaths. *Anesth Analg* 1987; 66:468-70
11. Valentine SJ, Marjot R, Monk CR: Preoxygenation in the elderly: A comparison of the 4-maximal breath and 3-minute techniques. *Anesth Analg* 1990; 71:516-9
12. McCarthy G, Elliott P, Mirakhur K, McLaughlin C: A comparison of different preoxygenation techniques in the elderly. *Anaesth* 1991; 46:824-7
13. Campbell IT, Beatty PCW: Monitoring preoxygenation. *Br J Anaes* 1994; 72:3-4

Anesthesiology  
1999; 91:606–8  
© 1999 American Society of Anesthesiologists, Inc.  
Lippincott Williams & Wilkins, Inc.

## Anesthetic Preconditioning

### *Not Just for the Heart?*

THE observation that brief episodes of ischemia in the heart, occurring before a subsequent longer interruption of blood flow, provides protection against dysfunction and necrosis has been termed *ischemic preconditioning*.<sup>1</sup> The protection is well described in a variety of animal models as well as in clinical settings, and it is not a trivial effect. In models of stunned myocardium in which dysfunction persists for hours or days after ischemia/reperfusion, preconditioning can virtually prevent contractile dysfunction. In models of infarction, the necrotic area within a region at risk can be reduced by 60–75%. Clinically, this can mean the difference between sustained inotropic support in the postoperative period or considerably greater functional capacity in patients after discharge. The study by Novalija *et al.*<sup>2</sup> in this issue of ANESTHESIOLOGY continues the series of rather remarkable studies demonstrating that brief exposure to a volatile anesthetic, in this case sevoflurane, can mimic a brief ischemic insult and thereby precondition the myocardium, decreasing reperfusion damage and dysfunction.

The preconditioning protection observed with brief ischemia seems to be mediated by release of adenosine—it can be duplicated by adenosine administration,<sup>3</sup> prevented by blockade of adenosine receptors<sup>4</sup> and by inhibition of 5'-nucleotidase,<sup>5</sup> which is responsible for generation of adenosine. Adenosine binds to its receptor (A1 and possibly A3), and *via* a G-protein-linked process, increases protein kinase C (PKC) activity. The resulting phosphorylation of the adenosine triphosphate

(ATP)-sensitive K channel ( $K_{ATP}$ ) results in the channel being less sensitive to inhibition by ATP.<sup>6</sup> Physiologically, the  $K_{ATP}$  channel opens when intracellular ATP stores are depleted, permitting  $K^+$  to flow out of the cell, thus restoring the resting membrane potential and decreasing activity. This channel plays an important role in regulating the tone of vascular smooth muscle by causing hyperpolarization and relaxation when oxygen delivery results in decreased ATP production. In the heart, the  $K_{ATP}$  channel is not normally active, but its sensitivity to inhibition by ATP is decreased with PKC activation. When  $K_{ATP}$  channel activity is increased, the cardiac action potential shortens, accompanied by a mild negative inotropic action and remarkable protection against a subsequent sustained ischemic or hypoxic insult. Preconditioning can also be elicited by activation of a variety of ligand receptors (endothelin,  $\delta$ -opiate,  $\alpha$ -adrenergic) that increase PKC activity, as well as by drugs such as  $K_{ATP}$  channel openers (e.g., nicorandil or cromakalim). Of special relevance to anesthesiology, brief exposure to a volatile anesthetic can activate cardioprotection against a subsequent prolonged ischemia that is identical to ischemic preconditioning in that it can be inhibited by blocking  $K_{ATP}$  channels or adenosine receptors.<sup>7–12</sup> Similar effects of ischemia and isoflurane and sevoflurane in preconditioning have also been demonstrated in isolated human atrium.<sup>13,14</sup>

Although initially attributed to  $K_{ATP}$  channel effects on the sarcolemma, the remarkably profound protective effect exceeds the modest electrophysiologic changes. Furthermore, preconditioning actions are observed in the absence of alterations in electrophysiologic behavior.<sup>15–17</sup> However, in addition to their location on the myocyte membrane,  $K_{ATP}$  channels are located in the mitochondrial inner membrane, where they seem to regulate mitochondrial volume as well as the massive electrical and proton gradient that powers ATP synthesis. Preconditioning can be initiated by the opening of mitochondrial  $K_{ATP}$  channels and prevented by their blockade.<sup>18,19</sup> The model that emerges is one in which surface receptor activation turns on PKC activity, resulting in activation of mitochondrial  $K_{ATP}$  channels to pro-

This Editorial View accompanies the following article: Novalija E, Fujita S, Kampine JP, Stowe DF: Sevoflurane mimics ischemic preconditioning effects on coronary flow and nitric oxide release in isolated hearts. ANESTHESIOLOGY 1999; 91:701–12.

Accepted for publication June 16, 1999.

Key words: ATP-sensitive K channels; endothelium; mitochondria; myocardium.



vide protection to myocytes.<sup>17,20</sup> PKC activity is actually mediated by a large class of ubiquitous phosphorylating enzymes that have varying requirements for activity (G proteins, phospholipids, diacylglycerol, and increased intracellular  $\text{Ca}^{2+}$ ). A recent study suggests that a particular isoform (PKC- $\delta$ ) is the type that is translocated to the mitochondria to activate  $\text{K}_{\text{ATP}}$  channels located there.<sup>21</sup> Evidence is accumulating to document the functional role of  $\text{K}_{\text{ATP}}$  channels in mitochondria, suggesting that channel activation leads to a decrease in the voltage gradient and a decrease in  $\text{Ca}^{2+}$  accumulation.<sup>20,22,23</sup> However, the exact pathway by which mitochondria and cells are protected remains to be defined.

Although demonstrating the cardioprotective effect of sevoflurane, the more newsworthy result in the article by Novalija *et al.* may be that this protection occurs not only in cardiac myocytes, but also extends to the endothelium of the coronary vasculature. A study dating back to the early 1990s demonstrated that a brief episode of ischemia also protects the functional integrity of the endothelium, demonstrating that the vasodilating capacity of the coronary vasculature was retained in hearts that were ischemically preconditioned.<sup>24</sup> The ischemic preconditioning of the endothelium also seems to be mediated, at least in part, by adenosine receptors and  $\text{K}_{\text{ATP}}$  channels.<sup>25</sup> In addition, further studies have demonstrated that structural integrity of endothelial cells is better maintained after preconditioning.<sup>26</sup> It is interesting that these structural studies of endothelial cells subjected to ischemia/reperfusion show marked mitochondrial swelling, an effect not observed in preconditioned endothelium.<sup>26</sup> In addition, the structural evidence of protection seemed to last for up to 1 month. Further studies are required to demonstrate more precisely how volatile anesthetic preconditioning compares with ischemic preconditioning of both myocytes as well as the endothelium.

One of the major features of endothelial protection by brief ischemia or anesthetics is the ability to generate nitric oxide and mediate vasodilation.<sup>2,25</sup> The presence of nitric oxide is not only important for regulating vascular tone, but also for its ability to prevent leukocyte adhesion and migration into reperfused tissues. Endothelial nitric oxide production can prevent recruitment of polymorphonuclear leukocytes (neutrophil) into ischemic regions.<sup>27-29</sup> Because neutrophil accumulation and infiltration clearly contributes to the postischemic "no reflow" phenomenon, contractile dysfunction, and myocardial necrosis, prevention of their accumulation by

maintained endothelial integrity is critically important. In addition, ischemia can induce expression of a variety of cell surface markers (P-selectin, intercellular adhesion molecule-1) and inflammatory mediators (tumor necrosis factor- $\alpha$ ) that also contribute to neutrophil accumulation.<sup>30</sup> If endothelial protection by anesthesia includes the prevention of the expression of the cell adhesion molecules such as P-selectin, the endothelial protection provided by the anesthetics during ischemia may have profound implications with regard to maintaining vascular integrity during the stressful period of reperfusion. Although there are conflicting data concerning the role of free radicals as well as the exact cellular biochemical pathways involved, the studies with regard to anesthetics suggest that there may be remarkable protection provided by these agents.

The good news for anesthesiologists is that volatile agents that we routinely use seem to provide a significant protective effect, not only on the myocardium, but on the vascular endothelium. If endothelium in other vascular beds shows similar degrees of protection, then the use of volatile anesthetics may provide important protection for a far wider variety of tissues. Over the next few years we can look forward to more detailed explanations of the pathways of anesthetic preconditioning, as well as the extent to which other tissues share the beneficial effects observed in the myocardium. Considerable effort will no doubt be expended to develop pharmacologic means to maximize protection, perhaps seeking other drugs that can provide the similar kind of protection provided by volatile anesthetics. In the mean time, we can be assured that at least certain anesthetic agents seem to precondition and protect, but much work remains to be performed to define fully the extent of protection.

**Carl Lynch III, M.D., Ph.D.**

Robert M. Epstein Professor and Chair  
Department of Anesthesiology  
University of Virginia Health System  
Charlottesville, Virginia 22906-0010

## References

1. Murry CE, Jennings RB, Reimer KA: Preconditioning with ischemia: A delay of lethal cell injury in ischemic myocardium. *Circulation* 1986; 74:1124-36
2. Novalija E, Fujita S, Kampine JP, Stowe DF: Sevoflurane mimics ischemic preconditioning effects on coronary flow and nitric oxide release in isolated hearts. *ANESTHESIOLOGY* 1999; 91:701-12
3. Yao Z, Gross GJ: A comparison of adenosine-induced cardiopro-

tection and ischemic preconditioning in dogs: Efficacy, time course, and role of  $K_{ATP}$  channels. *Circulation* 1994; 89:1229-36

4. Van Winkle DM, Chien GL, Wolff RA, Soifer BE, Kuzume K, David RF: Cardioprotection provided by adenosine receptor activation is abolished by blockade of the  $K_{ATP}$  channel. *Am J Physiol* 1994; 266:H829-39

5. Kitakaze M, Hori M, Morioka T, Minamino T, Takashima S, Sato H, Shinozaki Y, Chujo M, Mori H, Inoue M, Kamada T: Infarct size-limiting effect of ischemic preconditioning is blunted by inhibition of 5'-nucleotidase activity and attenuation of adenosine release. *Circulation* 1994; 89:1237-46

6. Light PE, Sabir AA, Allen BG, Walsh MP, French RJ: Protein kinase C-induced changes in the stoichiometry of ATP binding activate cardiac ATP-sensitive  $K^+$  channels. *Circ Res* 1996; 79:399-406

7. Cason BA, Shubayev I, Hickey RF: Blockade of adenosine triphosphate-sensitive potassium channels eliminates isoflurane-induced coronary artery vasodilation. *ANESTHESIOLOGY* 1994; 81:1245-55

8. Kersten JR, Lowe D, Hettrick DA, Pagel PS, Gross GJ, Warltier DC: Glyburide, a  $K_{ATP}$  channel antagonist, attenuates the cardioprotective effects of isoflurane in stunned myocardium. *Anesth Analg* 1996; 83:27-33

9. Kersten JR, Schmeling TJ, Hettrick DA, Pagel PS, Gross GJ, Warltier DC: Mechanism of myocardial protection by isoflurane: Role of adenosine triphosphate-regulated potassium ( $K_{ATP}$ ) channels. *ANESTHESIOLOGY* 1996; 85:794-807

10. Kersten JR, Orth KG, Pagel PS, Mei DA, Gross GJ, Warltier DC: Role of adenosine in isoflurane-induced cardioprotection. *ANESTHESIOLOGY* 1997; 86:1128-39

11. Kersten JR, Schmeling TJ, Pagel PS, Gross GJ, Warltier DC: Isoflurane mimics ischemic preconditioning *via* activation of  $K_{ATP}$  channels: Reduction of myocardial infarct size with an acute memory phase. *ANESTHESIOLOGY* 1997; 87:361-70

12. Cope DK, Impastato WK, Cohen MV, Downey JM: Volatile anesthetics protect the ischemic rabbit myocardium from infarction. *ANESTHESIOLOGY* 1997; 109:699-709

13. Roscoe AK, Lynch C III: Isoflurane activates preconditioning and ischemic protection in human atrial myocardium, halothane does not (abstract). *Anesth Analg* 1998; 86:SCA37

14. Roscoe AK, Lynch C III, Baum VC: Sevoflurane protects human myocardium from ischemia via activation of ATP-sensitive potassium channels (abstract). *Anesth Analg* 1999; 88:SCA57

15. Yao Z, Gross GJ: Effects of the  $K_{ATP}$  channel opener bimakalim on coronary blood flow, monophasic action potential duration, and infarct size in dogs. *Circulation* 1994; 89:1769-75

16. Grover GJ, D'Alonzo AJ, Parham CS, Darbenzio RB: Cardioprotection with the  $K_{ATP}$  channel opener cromakalim is not correlated with ischemic myocardial action potential duration. *J Cardiovasc Pharmacol* 1995; 25:145-52

17. Gross GJ, Fryer RM: Sarcolemmal versus mitochondrial ATP-

sensitive  $K^+$  channels and myocardial preconditioning. *Circ Res* 1999; 84:973-9

18. Garlid KD, Paucek P, Yarov-Yarovoy V, Sun X, Schindler PA: The mitochondrial K channel as a receptor for potassium channel openers. *J Biol Chem* 1996; 271:8796-9

19. Garlid KD, Paucek P, Yarov-Yarovoy V, Murray HN, Darbenzio RB, D'Alonzo AJ, Lodge NJ, Smith MA, Grover GJ: Cardioprotective effect of diazoxide and its interaction with mitochondrial ATP-sensitive  $K^+$  channels: Possible mechanism of cardioprotection. *Circ Res* 1997; 81:1072-82

20. Sato T, O'Rourke B, Marban E: Modulation of mitochondrial ATP-dependent  $K^+$  channels by protein kinase C. *Circ Res* 1998; 83:110-4

21. Wang Y, Ashraf M: Role for protein kinase C in mitochondrial KATP channel-mediated protection against  $Ca^{2+}$  overload injury in rat myocardium. *Circ Res* 1999; 84:1156-65

22. Liu Y, Sato T, O'Rourke B, Marban E: Mitochondrial ATP-dependent potassium channels: Novel effectors of cardioprotection? *Circulation* 1998; 97:2463-9

23. Holmuhamedov EL, Jovanovic S, Dzeja PP, Jovanovic A, Terzic A: Mitochondrial ATP-sensitive  $K^+$  channels modulate cardiac mitochondrial function. *Am J Physiol* 1998; 275:H1567-76

24. Richard V, Kaeffer N, Tron C, Thuillez C: Ischemic preconditioning protects against coronary endothelial dysfunction induced by ischemia and reperfusion. *Circulation* 1994; 89:1254-61

25. Bouchard J-F, Lamontagne D: Mechanisms of protection afforded by preconditioning to endothelial function against ischemic injury. *Am J Physiol* 1996; 271:H1801-6

26. Kaeffer N, Richard V, Francois A, Lallemand F, Henry JP, Thuillez C: Preconditioning prevents chronic reperfusion-induced coronary endothelial dysfunction in rats. *Am J Physiol* 1996; 271:H842-9

27. Pabla R, Buda AJ, Flynn DM, Blesse SA, Shin AM, Curtis MJ, Lefer DJ: Nitric oxide attenuates neutrophil-mediated myocardial contractile dysfunction after ischemia and reperfusion. *Circ Res* 1996; 78:65-72

28. Jones SP, Girod WG, Palazzo AJ, Granger DN, Grisham MB, Jourdain D, Huang PL, Lefer DJ: Myocardial ischemia-reperfusion injury is exacerbated in the absence of endothelial cell nitric oxide synthase. *Am J Physiol* 1999; 276:H1567-73

29. Thourani VH, Nakamura M, Duarte IG, Bufkin BL, Zhao ZQ, Jordan JE, Shearer ST, Guyton RA, Vinten-Johansen J: Ischemic preconditioning attenuates postischemic coronary artery endothelial dysfunction in a model of minimally invasive direct coronary artery bypass grafting. *J Thorac Cardiovasc Surg* 1999; 117:383-9

30. Kupatt C, Habazettl H, Goedecke A, Wolf DA, Zahler S, Boekstegers P, Kelly RA, Becker BF: Tumor necrosis factor- $\alpha$  contributes to ischemia- and reperfusion-induced endothelial activation in isolated hearts. *Circ Res* 1999; 84:392-400

Anesthesiology  
1999; 91:609–11  
© 1999 American Society of Anesthesiologists, Inc.  
Lippincott Williams & Wilkins, Inc.

## ***The Legal System and Patient Safety: Charting a Divergent Course***

### ***The Relationship between Malpractice Litigation and Human Errors***

TO sustain a claim of medical malpractice, a plaintiff must show a pre-existing duty on the part of the physician and then a breach of that duty that causes the plaintiff damages.<sup>1</sup> The duty arises most commonly when a physician-patient relationship is formed and requires the physician to provide patient care that a similarly situated practitioner in good standing would provide in the same clinical circumstances.<sup>2</sup> Care falling below this standard represents a breach of duty; if the breach causes the patient injury, the physician is liable for damages. Plaintiff claims of a breach of the standard of care and causation generally must be supported by expert testimony.<sup>3</sup> However, in this issue of ANESTHESIOLOGY, Edbril and Lagasse<sup>4</sup> report data that indicate adjudication of medical malpractice claims may not follow these legal precepts. They find that upon review of anesthesia care by anesthesiologists provided in an academic setting, substandard care was unrelated to litigation risk and adverse malpractice adjudication. Thus, the standard of care defined by anesthesiologists, as mandated by the legal system, does not seem to comport with litigation risk and malpractice adjudications against anesthesiologists.

This study adds to the growing literature indicating that the legal system may not be adjudicating malpractice claims according to the legal rule. Using data from the Harvard Medical Practice Study, Brennan *et al.*<sup>5</sup> found that malpractice liability was only correlated with severity of patient injury, not negligence. Furthermore, in their seminal work from the American Society of Anesthesiologists closed claims study, Cheney *et al.*<sup>6</sup> found that more than 40% of patients who were provided appropriate, nonnegligent care as defined by neutral anesthesiologists still collected payments from these

anesthesiologists. But physicians also disagree with jury verdicts that hold for the defendant physician. Liang<sup>3</sup> reported that a homogeneous sample of neutral anesthesiologists in an academic center disagree with jury verdicts, even in some cases in which juries found no defendant anesthesiologist negligence. Radiologists have shown similar behavior.<sup>7</sup> These findings are compelling because it has also been reported that lay persons, without medical or legal knowledge, are statistically better able to predict jury verdicts than anesthesiologists, who are legally informed as to the standard of care through their clinical training.<sup>8</sup> Even studies that report that the tort system assesses negligence appropriately find that non-negligent physicians are still required to pay malpractice judgments against them.<sup>9,10</sup> Thus, one major goal of the medical malpractice tort system—to provide efficient and appropriate physician incentives to render nonnegligent care to minimize patient injury—seems to be unfulfilled by the traditional tort system.

Furthermore, Edbril and Lagasse report that anesthesia care deemed negligent by the study's reviewers did not result in patient suit or malpractice system compensation. This result, too, is consistent with results from the Harvard Medical Practice Study, which reported that very few negligently injured patients are compensated by the tort system.<sup>11–13</sup> Hence, the other major goal of the malpractice system—compensation of patients who are negligently (as defined by the legal standard) injured—also seems to be unfulfilled. These conclusions raise the possibility that the billions of dollars spent on the malpractice system annually<sup>14</sup> may not be an effective allocation of social resources to minimize patient injury, maximize patient safety, and compensate injured patients.<sup>3</sup>

Edbril and Lagasse suggest that to combat these legal system weaknesses, a peer-review process should be used to assess provider negligence. However, this approach has significant difficulties. Hindsight bias plays a tremendous role in *ex post* review of clinical circumstances<sup>15–17</sup>; thus, negligence may be overestimated. In-

This Editorial View accompanies the following article: Edbril SD, Lagasse RS: The relationship between malpractice litigation and human errors. ANESTHESIOLOGY 1999; 91:848–55.

Accepted for publication May 18, 1999.

Key words: Health policy; law; tort system.

deed, Edbril and Lagasse's characterization that all adverse events are somehow a result of "error" seems to reflect this bias. Most researchers in this field would not characterize adverse events in this manner because even appropriate provider actions may result in untoward clinical results. This is best exemplified by Edbril and Lagasse's own definition of system error, including accidental occurrences that result from performing a technique properly, equipment failure despite proper use, miscommunication while following established protocol, inability to diagnose a disease process because of limitations of presently available screening and monitoring standards, inability to treat a disease process because of limitations in present standards of care, and inability to meet the demands for resources of equipment or personnel. These "system errors" accounted for 88% of the total errors reported, none of which are preventable. We do not believe these are errors at all and instead represent untoward events that are not preventable. We must emphasize that the human errors that resulted in a disabling injury as reviewed by Edbril and Lagasse form the basis of their report, not the system errors. Finally, it is difficult to determine whether such a peer-review system would result in cost savings relative to the current litigation system. Attorneys presently reject most requests for malpractice claim representation; reducing such barriers to facilitate plaintiff claim filing through peer review or other low-cost administrative mechanisms may consume and even surpass the cost savings from avoiding court.<sup>14,18,19</sup>

Other investigators have suggested the use of clinical practice guidelines.<sup>20</sup> The use of clinical practice guidelines is fraught with difficulty at the outset because these guidelines are not recognized legally as the standard of care.<sup>20</sup> Furthermore, guidelines, similar to a peer review process, assume there is a single standard of care for all clinical circumstances; this may be too narrow a viewpoint.<sup>21</sup> Significant discordance between evaluating physicians has been reported when assessing clinical scenarios,<sup>7,8,22,23</sup> reflecting the well-known variability phenomena in clinical care.<sup>24,25</sup> The standard of care consensus in the study by Edbril and Lagasse most likely reflects homogeneity of a single anesthesiology department, which was the sole source of reviewers. The vast majority of practice guidelines are also formulated by consensus rather than double-blind study and may conflict in their recommendations.<sup>26</sup> An excellent example of a clinical practice guideline with such problems is the pulmonary artery catheterization guideline published in ANESTHESIOLOGY.<sup>27</sup> This guideline does not provide objec-

tive evidence to support the benefits versus the risks of pulmonary artery catheterization, but merely lists the pros and cons regarding catheter use and clinical scenarios in which some practitioners have found them useful. Guidelines are also limited by the source from which they emanate,<sup>28</sup> which may reflect specialty turf battles rather than clinical indication or medical appropriateness. Finally, these guidelines are often outdated as soon as they are published and, in any event, are manipulated by local physicians and managed care organizations before being put into use.<sup>29</sup>

The reported results have significant implications for patient safety efforts. Instead of providing anesthesiologists with a clear incentive to provide nonnegligent care, the uncertainty of legal adjudication in practice may result in a heightened level of defensive medicine and paradoxically an *increased* risk of patient injury.<sup>3,8,30</sup> Although there is significant debate as to whether the legal system actually induces defensive medicine,<sup>30</sup> other mechanisms that instead induce physicians to proactively adopt behaviors that minimize patient injury and maximize patient safety would be a far better way to spend current malpractice system dollars.

To fulfill the goal of maximizing patient safety, a commitment to using these dollars to focus on evidence-based medicine and patient safety outcomes is essential.<sup>31</sup> A concurrent and necessary step would be to provide for immunity against legal discovery of data from internal and external safety reporting systems to encourage error reporting. Currently, legal incentives and potential discovery of this information in tort suits substantially chill reporting medical error.<sup>30,31</sup> In combination, open reporting of medical error and resources devoted to studying the issues so identified would provide significant progress toward systemically maximizing patient safety.<sup>30</sup> Similarly, accreditation organization support *via* data standardization, nonpunitive reporting approaches, and education would begin the process of broad, interprovider analyses that may yield insights into methods to maximize patient safety and minimize error.<sup>30</sup>

To accomplish the goal of compensation, one possible mechanism could be the use of a workers' compensation-type system for patient injury caused by medical error, with direct patient suits available only for situations of reckless provider actions. For the small minority of direct patient suits involving such actions, court-appointed experts representing the court, not the litigants, would be far more appropriate, eliminating financial bias from an expert's opinion. A similar system has recently been proposed for the aviation industry.<sup>32</sup> This approach



## EDITORIAL VIEWS

would focus on corrective action to improve patient safety, reduce the threat to clinicians of reporting errors, and still deter inappropriate, high-risk behavior.

Overall, Edbril and Lagasse's work highlights for the anesthesia community the significant weaknesses of the traditional tort system and the incentives it creates.<sup>30,31</sup> Their work also puts into stark relief the fundamental need for new methods to appropriately affect physician behavior so that the health delivery system can continuously improve in its efforts to provide safe, effective medical care while minimizing medical error and patient injury.<sup>30</sup>

**Bryan A. Liang, M.D., Ph.D., J.D.**

Dr. Arthur W. Grayson Distinguished Visiting Professor of Law & Medicine

Southern Illinois University School of Law  
Carbondale, Illinois 62901-6804  
baliang@alum.mit.edu

**David J. Cullen, M.D., M.S.**

Professor of Anesthesiology  
Chairman, Department of Anesthesiology  
Tufts University School of Medicine  
St. Elizabeth's Medical Center  
Boston, Massachusetts 02135-2997  
stether@semc.org

## References

- Keeton WP, Dobbs DB, Kecton RE, Owens DG: Prosser and Keeton on the Law of Torts, 5th Edition. St. Paul, West Publishing, 1984
- Liang BA: Legal issues in transfusing a Jehovah's Witness patient following cesarean section. *J Clin Anesth* 1995; 7:522-4
- Liang BA: Clinical assessment of malpractice case scenarios in an anesthesiology department. *J Clin Anesth* 1999; in press
- Edbril SD, Lagasse RS: The relationship between malpractice litigation and human errors. *ANESTHESIOLOGY* 1999; 91:848-55
- Brennan TA, Sox CM, Burstin HR: Relation between negligent adverse events and the outcomes of medical-malpractice litigation. *N Engl J Med* 1996; 335:370-6
- Cheney FW, Posner K, Caplan RA, Ward RJ: Standard of care and anesthesia liability. *JAMA* 1989; 261:1599-1603
- Liang BA: Medical malpractice: Do physicians have legal knowledge and assess cases as juries do? *Univ Chicago Law School Roundtable* 1996; 3:59-110
- Liang BA: Assessing medical malpractice jury verdicts: A case study of an anesthesiology department. *Cornell J Law Public Policy* 1997; 7:121-64
- White MJ: The value of liability in medical malpractice. *Health Aff (Milwood)* 1994; 13:75-87
- Taragin MI, Willett LR, Wilczek AP, Trout R, Carson JL: The influence of standard of care and severity of injury on the resolution of medical malpractice claims. *Ann Intern Med* 1992; 117:780-4
- Localio AR, Lawthers AG, Brennan TA, Laird NM, Hebert LE, Petersen LN, Newhouse JP, Weiler PC, Hiatt HH: Relation between malpractice claims and adverse events due to negligence. Results of the Harvard Medical Practice Study III. *N Engl J Med* 1991; 325:245-51
- Brennan TA, Leape LL, Laird NM, Hebert L, Localio AR, Lawthers AG, Newhouse JP, Weiler PC, Hiatt HH: Incidence of adverse events and negligence in hospitalized patients. Results of the Harvard Medical Practice Study I. *N Engl J Med* 1991; 324:370-6
- Leape LL, Brennan TA, Laird N, Lawthers AG, Localio AR, Barnes BA, Hebert L, Newhouse JP, Weiler PC, Hiatt HH: The nature of adverse events in hospitalized patients. Results of the Harvard Medical Practice Study II. *N Engl J Med* 1991; 324:377-84
- Weiler PC: *Medical Malpractice on Trial*. Cambridge, Harvard University Press, 1991
- Kamin KA, Rachlinski JJ: Ex post ex ante: Determining liability in hindsight. *Law Hum Behav* 1995; 19:89-104
- LaBine SJ, LaBine G: Determination of negligence and the hindsight bias. *Law Hum Behav* 1996; 20:501-16
- Caplan RA, Posner K, Cheney FW: Effect of outcome of physician judgments of appropriateness of care. *JAMA* 1991; 265:1057-60
- Johnson WG, Brennan TA, Newhouse JP, Leape LL, Lawthers AG, Hiatt HH, Weiler PC: The economic consequences of medical injuries: Implications for a no-fault insurance plan. *JAMA* 1992; 267:2487-92
- Huycke LI, Huycke MM: Characteristics of potential plaintiffs in malpractice litigation. *Ann Intern Med* 1994; 120:792-8
- Brennan TA: Practice guidelines and malpractice litigation: Collision or cohesion? *J Health Politics Policy Law* 1991; 16:67-85
- Meadow W, Mendez D, Lantos J, Hipps R, Ostrowski M: What is the legal 'standard of care' when there is no standard of care? A survey of the use of home apnea monitoring by neonatology fellowship training programs in the United States. *Pediatrics* 1992; 89:1083-8
- Posner K, Caplan RA, Cheney FW: Variation in expert opinion in medical malpractice review. *ANESTHESIOLOGY* 1996; 85:1049-54
- Localio AR, Weaver SL, Landis JR, Lawthers AG, Brennan TA, Hebert L, Sharp TJ: Identifying adverse events caused by medical care: Degree of physician agreement in a retrospective chart review. *Ann Intern Med* 1996; 125:457-63
- Liang BA, Austin JHL, Alderson PO: Analysis of the resource-based relative value scale for Medicare reimbursements to academic and community hospital radiology departments. *Radiology* 1991; 179:751-8
- Wennberg JE, Gittlesohn A: Variations in medical care among small areas. *Sci Am* 1982; 246:120-34
- Hong DW, Liang BA: The scope of clinical practice guidelines. *Hosp Phys* 1996; 32:46-59
- American Society of Anesthesiologists Task Force on Pulmonary Artery Catheterization: Practice guidelines for pulmonary artery catheterization. *ANESTHESIOLOGY* 1993;78:380-94
- U.S. General Accounting Office: Practice guidelines: The experience of medical specialty societies. Publication no. GAO/PEMD-91-11. Washington, DC, U.S. General Accounting Office, 1991
- U.S. General Accounting Office: Practice guidelines: Managed care plans customize guidelines to meet local interests. Publication no. GAO/HEHS-96-95. Washington, DC, U.S. General Accounting Office, 1996
- Liang BA: Error in medicine: Legal impediments to U.S. Reform. *J Health Politics Policy Law* 1999; 24:27-58
- Liang BA: Patient injury incentives in law. *Yale Law Policy Rev* 1998; 17:1-93
- Marx D, Desmarais R, Chidoster T, Liang BA: Corporate discipline and regulatory enforcement: Their relationship to aviation safety. Warrendale, PA, Society of Automotive Engineers International, Proceedings of SAE Advances in Aviation Safety, Daytona Beach, Florida, April 13-15, 1999
